# Supplementary figures and images for: Neutrophil extracellular traps and extracellular histones potentiate IL-17 inflammation in periodontitis
Source: PubMed Central journal article supplement — J Exp Med. 2023 Jun 1;220(9):e20221751. doi: 10.1084/jem.20221751 (PMC10236943; doi:10.1084/jem.20221751), 2023-06-01

Supplementary Figure 1F

---

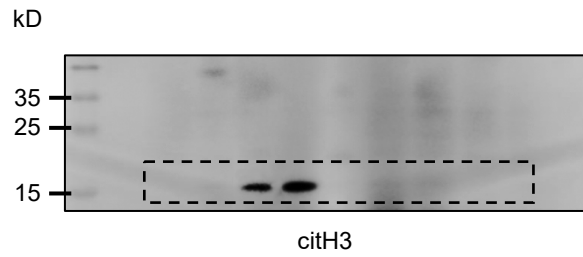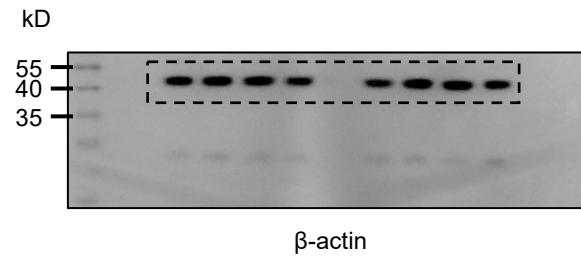

Supplement: JEM_20221751_SourceDataFS1.pdf [file JEM_20221751_SourceDataFS1.pdf]

### Supplementary Figure 3A

---

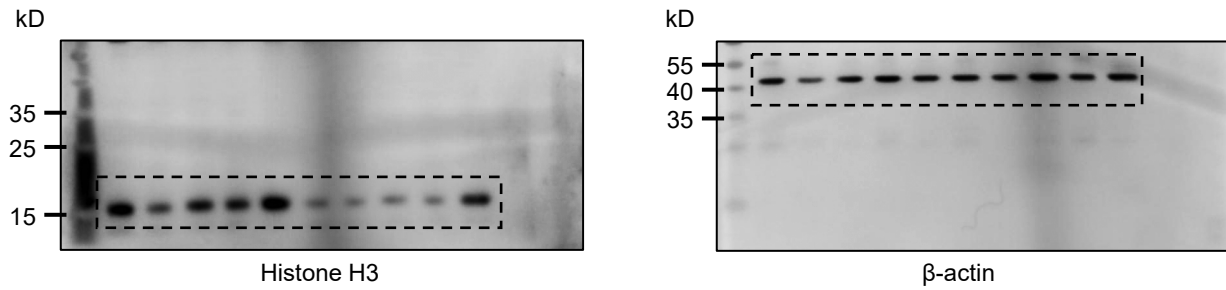

### Supplementary Figure 3B

---

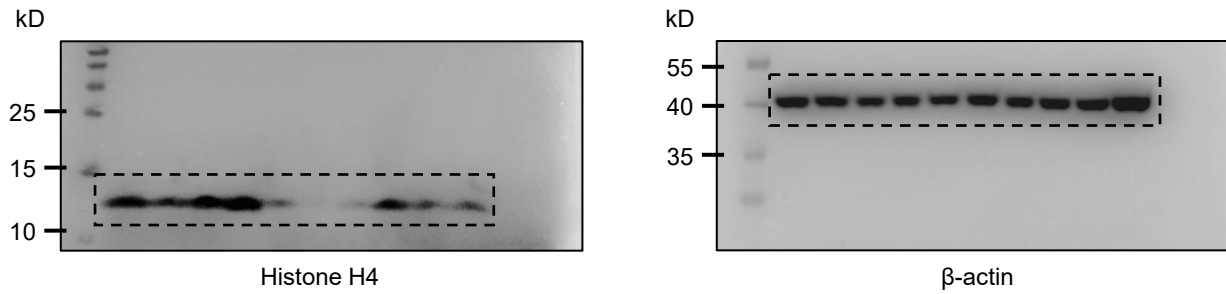

### Supplementary Figure 3C

---

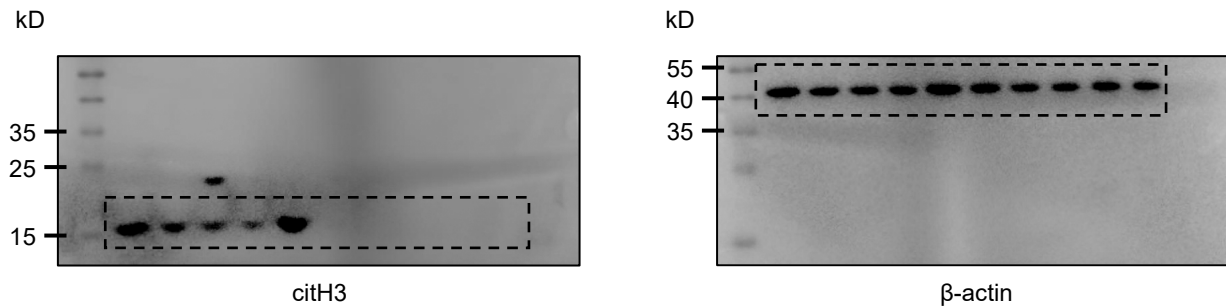

Supplement: JEM_20221751_SourceDataFS3.pdf [file JEM_20221751_SourceDataFS3.pdf]
